# Supplementary material for: Carbon monoxide as an intermediate product in the photocatalytic steam reforming of methane with lanthanum-doped sodium tantalate
Source: Royal Society of Chemistry journal article supplement (doi:10.1039/d1cy00264c), 2021-01-01
Supplement: d1cy00264c1.pdf [file d1cy00264c1.pdf]

## Supplementary information

# Carbon monoxide formation as an intermediate product in photocatalytic steam reforming of methane with lanthanum-doped sodium tantalate

Wirya Sarwana,<sup>a,b</sup> Akihiko Anzai,<sup>a</sup> Daichi Takami,<sup>a</sup>  
Akira Yamamoto,<sup>a,c</sup> and Hisao Yoshida,<sup>a,c,\*</sup>

<sup>a</sup> Graduate School of Human and Environmental Studies, Kyoto University, Kyoto 606-8501, Japan

<sup>b</sup> Department of Mechanical Engineering, Sumbawa University of Technology, Olat Maras, Sumbawa, West Nusa Tenggara, 84371, Indonesia

<sup>c</sup> Elements Strategy Initiative for Catalysts and Batteries (ESICB), Kyoto University, Kyoto 615-8520, Japan

\* Corresponding author: yoshida.hisao.2a@kyoto-u.ac.jp

### Contents

Fig. S1 Scheme of the flow reactor

Fig. S2 XRD patterns

Fig. S3 Relationship between particle size and BET surface area

Fig. S4 DRS UV-Vis Spectra

Fig. S5 (A) Photocatalytic performance of the NTO:La(2) in different feed flow rate

Fig. S5 (B) Photocatalytic performance of the NTO:La(2) in different CH<sub>4</sub>/H<sub>2</sub>O ratio

Fig. S6 Photocatalytic performance of the NTO:La(1) sample in different CH<sub>4</sub> concentration.

Table S1 Photocatalytic activity of various photocatalysts in the PSRM.

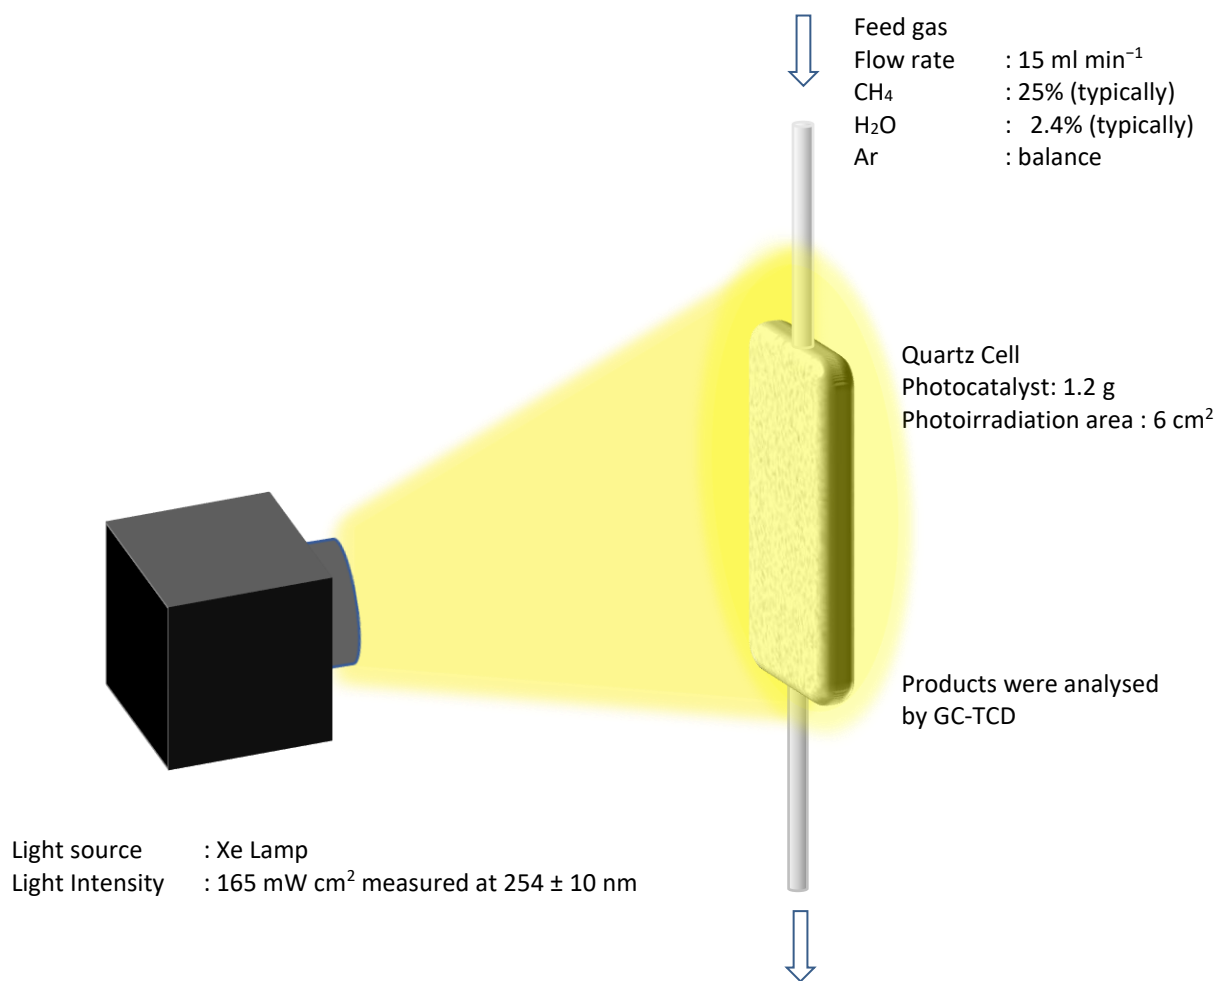

**Fig. S1** Scheme of the flow reactor employed in the photocatalytic reaction test for PSRM<sup>1-3</sup>

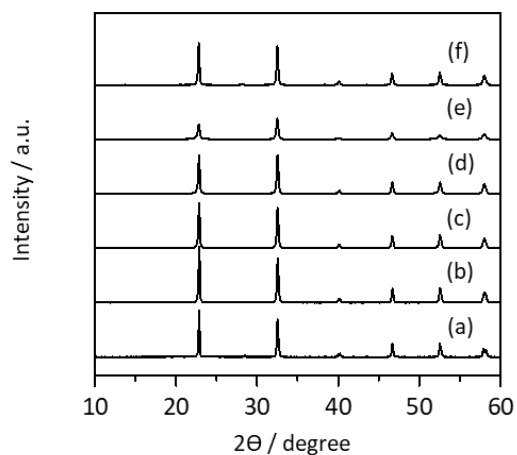

**Fig. S2** X-ray diffraction patterns of the samples, (a) non-doped NTO, (b) NTO:La(0.5), (c) NTO:La(1), (d) NTO:La(2), (e) NTO:La(5), and (f) NTO:La(2)SS.

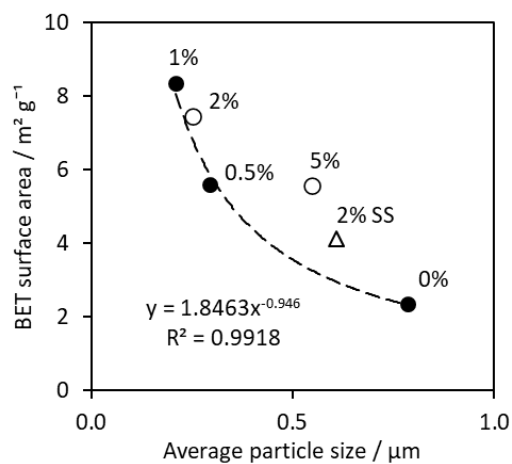

**Fig. S3** Relationship between particle size and BET surface area of the bare NTO and NTO:La samples prepared by a flux method. The symbols are the actual data. The dashed line was the curve expected from the values for the NTO:La samples with 0–1% of La doping.

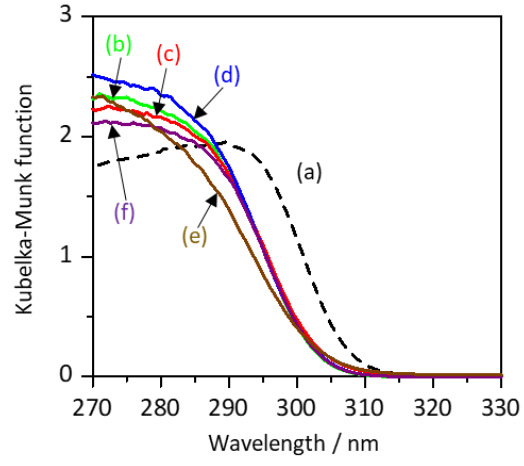

**Fig. S4** DR UV-Vis Spectra of the samples, (a) non-doped NTO, (b) NTO:La(0.5), (c) NTO:La(1), (d) NTO:La(2), (e) NTO:La(5), and (f) NTO:La(2)SS.

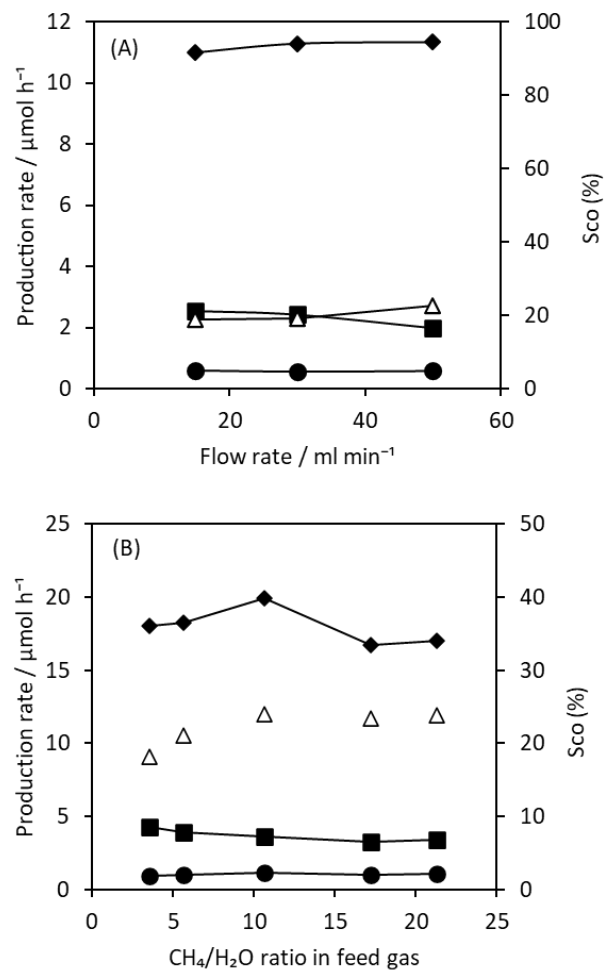

**Fig. S5** Photocatalytic production rates of CO (circle), CO<sub>2</sub> (square), and H<sub>2</sub> (diamond) equipped with the CO selectivity (triangle) in various reaction conditions, (A) various flow rates of the feed gas mixture: 15, 30, and 50  $\text{ml min}^{-1}$ ; light intensity, 35  $\text{mW cm}^{-2}$ ; feed gas composition: CH<sub>4</sub> (35%), steam (2%), and Ar (balance); the photocatalyst, the NTO:La(2) sample, and (B) various CH<sub>4</sub>/H<sub>2</sub>O ratio in the feed gas: CH<sub>4</sub> (10–40%), steam (1.9–2.8%), and Ar (balance); light intensity, 165  $\text{mW cm}^{-2}$ ; flow rate, 15  $\text{ml min}^{-1}$ ; the photocatalyst, the NTO:La(1) sample. The photocatalyst used was 1.2 g and the irradiation area was 6  $\text{cm}^2$ , in common.

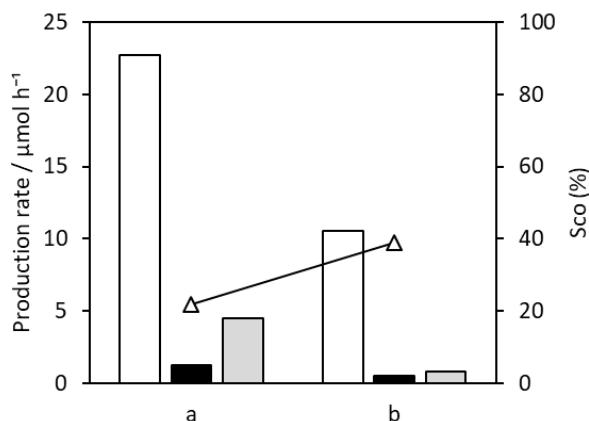

**Fig. S6** Photocatalytic production rates of  $\text{H}_2$  (white bar), CO (black bar),  $\text{CO}_2$  (gray bar) as well as  $S_{\text{CO}}$  (white triangle, the CO selectivity) in different  $\text{CH}_4$  concentrations, (a) 25% of  $\text{CH}_4$ , 2.4% of steam, 72.6% of Ar and (b) 90% of  $\text{CH}_4$ , 0.3% of steam, 9.7% of Ar, over the NTO:La(1) photocatalyst. Photocatalyst: 1.2 g, photoirradiation area:  $6 \text{ cm}^2$ , and light intensity:  $165 \text{ mW cm}^{-2}$ . Sampling was carried out after 2 hours irradiation.

**Table S1** Photocatalytic activity of various photocatalysts in the PSRM <sup>a</sup>

| Entry | Sample                  | Metal loading amount (wt%) | Production rate / $\mu\text{mol h}^{-1}$ |     |               | $S_{\text{CO}}$ (%) | R    |
|-------|-------------------------|----------------------------|------------------------------------------|-----|---------------|---------------------|------|
|       |                         |                            | $\text{H}_2$                             | CO  | $\text{CO}_2$ |                     |      |
| 1     | NTO:La(1)               | -                          | 8.0                                      | 0.4 | 1.6           | 20%                 | 1.1  |
| 2     | Pt(0.1)/NTO:La(1)       | 0.1                        | 10.2                                     | 0.0 | 2.7           | 0%                  | 1.0  |
| 3     | Pd(0.1)/NTO:La(1)       | 0.1                        | 9.1                                      | 0.0 | 0.2           | 0%                  | 12.8 |
| 4     | Au(0.1)/NTO:La(1)       | 0.1                        | 7.7                                      | 0.3 | 1.4           | 17%                 | 1.2  |
| 5     | Ag(0.1)/NTO:La(1)       | 0.1                        | 3.6                                      | 0.1 | 0.3           | 17%                 | 2.4  |
| 6     | NiO(0.7)/NTO:La(1)      | 0.7                        | 5.5                                      | 0.0 | 0.4           | 0%                  | 3.1  |
| 7     | CuO(1)/NTO:La(1)        | 1                          | 3.9                                      | 0.1 | 0.7           | 16%                 | 1.3  |
| 8     | ZnO(1)/NTO:La(1)        | 1                          | 0.1                                      | 0.0 | 0.0           | 0%                  | -    |
| 9     | non-doped NTO           | -                          | 1.3                                      | 0.0 | 0.0           | 0%                  | -    |
| 10    | $\text{Ga}_2\text{O}_3$ | -                          | 2.2                                      | 0.1 | 0.4           | 19%                 | 1.1  |
| 11    | ZnO                     | -                          | 0.3                                      | 0.0 | 0.0           | 0%                  | -    |
| 12    | $\text{TiO}_2$          | -                          | 0.2                                      | 0.0 | 0.0           | 0%                  | -    |

<sup>a</sup> Reaction conditions: photoirradiation area,  $6 \text{ cm}^2$ ; feed gas: 25%  $\text{CH}_4$ , 72.6% Ar, and 2.4% steam (total flow rate:  $15 \text{ ml min}^{-1}$ ); light intensity:  $27 \text{ mW cm}^{-2}$ .

## References

- 1 A. Yamamoto, S. Mizuba, Y. Saeki and H. Yoshida, *Appl. Catal. Gen.*, 2016, **521**, 125–132.
- 2 H. Yoshida, S. Mizuba and A. Yamamoto, *Catal. Today*, 2019, **334**, 30–36.
- 3 A. Anzai, K. Fujiwara, A. Yamamoto and H. Yoshida, *Catal. Today*, 2020, **352**, 1–9.
